# Supplementary material for: Carboxyhemoglobin (CO-Hb) Correlates with Hemolysis and Hospital Mortality in Extracorporeal Membrane Oxygenation: A Retrospective Registry
Source: MDPI journal article supplement (doi:10.3390/diagnostics12071642), 2022-07-05
Supplement: s1 [file s1]

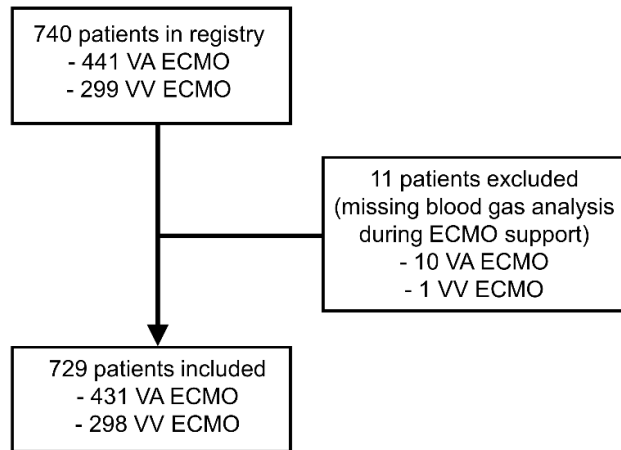

**Figure S1.** Patient selection.

**Table S1.** Correlation of hemolysis parameter for nearest CO-Hb.

|                 | Any ECMO |            | VA ECMO |            | VV ECMO |            |
|-----------------|----------|------------|---------|------------|---------|------------|
|                 | $r^2$    | $p$ -value | $r^2$   | $p$ -value | $r^2$   | $p$ -value |
| LDH             | 0.0027   | <0.0001    | 0.0341  | <0.0001    | 0.0023  | 0.0276     |
| Haptoglobin     | 0.0648   | <0.0001    | 0.0401  | <0.0001    | 0.1343  | <0.0001    |
| Hemolysis index | 0.0138   | <0.0001    | 0.0692  | <0.0001    | 0.0094  | <0.0001    |
| Bilirubin       | 0.0014   | <0.0001    | 0.2117  | <0.0001    | 0.0002  | 0.0188     |

Blood markers of hemolysis were correlated to the nearest CO-Hb available using Pearson's correlation. Table gives  $r^2$  and significance for each of the four markers of hemolysis (LDH, haptoglobin, hemolysis index, and bilirubin) investigated. Abbreviations: *LDH* lactate dehydrogenase, *VV ECMO* veno-venous extracorporeal membrane oxygenation, *VA ECMO* veno-arterial extracorporeal membrane oxygenation.
